# Supplementary material
Source: publisher figshare collection journal article supplement (https://acs.figshare.com/ndownloader/files/3616368)
Supplement: Supplementary file 1 [file 3616368]

## Sheet: Supplementary Table S3
FileName	XCorr	DeltCN	Conf%	M+H+	CalcM+H+	PPM	TotalIntensity	SpR	Prob Score	pI	IonProportion	Spectral Counts	Proteins	Sequence	Mod Sequence	Localization Score	Debunker Score	Site
Dam1_20130201_1.9208.9208.2	3.0896	0.3855	100	2138.94	2137.92	4.6	3683.6	1	8.79217	3.47	73.9	1	[YKL052C ASK1 SGDID:S000001535, Chr XI from 340546-339668, Genome Release 64-1-1, reverse complement, Verified ORF, "Essential subunit of the Dam1 complex (aka DASH complex), couples kinetochores to the force produced by MT depolymerization thereby aiding	R.IMDS(79.9663)TEWLGTMFQETGLV.N	IMDS*TEWLGTMFQETGLV	0,	0.145254	[S56]
Dam1_20130201_4.11310.11310.3	6.8364	0.6143	100	3658.74	3653.74	-3	46415.3	1	10.547	4.14	49.4	109	[YKL052C ASK1 SGDID:S000001535, Chr XI from 340546-339668, Genome Release 64-1-1, reverse complement, Verified ORF, "Essential subunit of the Dam1 complex (aka DASH complex), couples kinetochores to the force produced by MT depolymerization thereby aiding	R.IMDSTEWLGTMFQET(79.9663)GLVNLQANAAAPVGNAPVK.S	IMDSTEWLGTMFQET*GLVNLQANAAAPVGNAPVK	39.72,	0.562154	T67
Dam1_20130201_4.13036.13036.3	5.4401	0.5829	100	3659.75	3653.74	-2.4	23494.6	4	9.6753	4.14	41.7	1	[YKL052C ASK1 SGDID:S000001535, Chr XI from 340546-339668, Genome Release 64-1-1, reverse complement, Verified ORF, "Essential subunit of the Dam1 complex (aka DASH complex), couples kinetochores to the force produced by MT depolymerization thereby aiding	R.IMDST(79.9663)EWLGTMFQETGLVNLQANAAAPVGNAPVK.S	IMDST*EWLGTMFQETGLVNLQANAAAPVGNAPVK	11.51,	0.408643	[S56]
Dam1_20130201_4.13056.13056.3	5.3971	0.5271	100	3655.74	3653.74	-0.1	19800.9	1	9.26751	4.14	43.7	1	[YKL052C ASK1 SGDID:S000001535, Chr XI from 340546-339668, Genome Release 64-1-1, reverse complement, Verified ORF, "Essential subunit of the Dam1 complex (aka DASH complex), couples kinetochores to the force produced by MT depolymerization thereby aiding	R.IMDS(79.9663)TEWLGTMFQETGLVNLQANAAAPVGNAPVK.S	IMDS*TEWLGTMFQETGLVNLQANAAAPVGNAPVK	0,	0.549334	[S56]
Dam1_20130201_4.13485.13485.3	4.9664	0.4663	100	3658.76	3653.74	2.1	12398.6	3	8.40746	4.14	36.6	5	[YKL052C ASK1 SGDID:S000001535, Chr XI from 340546-339668, Genome Release 64-1-1, reverse complement, Verified ORF, "Essential subunit of the Dam1 complex (aka DASH complex), couples kinetochores to the force produced by MT depolymerization thereby aiding	R.IMDSTEWLGT(79.9663)MFQETGLVNLQANAAAPVGNAPVK.S	IMDSTEWLGTMFQET*GLVNLQANAAAPVGNAPVK	3.53,	0.825658	[T67]
Dam1_20130201_3.8160.8160.3	6.0205	0.5433	100	3735.72	3733.7	1.9	26145.7	2	9.90233	4.14	55.3	28	[YKL052C ASK1 SGDID:S000001535, Chr XI from 340546-339668, Genome Release 64-1-1, reverse complement, Verified ORF, "Essential subunit of the Dam1 complex (aka DASH complex), couples kinetochores to the force produced by MT depolymerization thereby aiding	R.IMDS(79.9663)TEWLGTMFQET(79.9663)GLVNLQANAAAPVGNAPVK.S	IMDST*EWLGTMFQET*GLVNLQANAAAPVGNAPVK	[0,26.66,]	0.928659	[T57], T67
Dam1_20130201_3.8776.8776.3	4.3645	0.5038	100	3735.71	3733.7	0.4	8338.9	1	8.25351	4.14	45.8	7	[YKL052C ASK1 SGDID:S000001535, Chr XI from 340546-339668, Genome Release 64-1-1, reverse complement, Verified ORF, "Essential subunit of the Dam1 complex (aka DASH complex), couples kinetochores to the force produced by MT depolymerization thereby aiding	R.IMDST(79.9663)EWLGTMFQET(79.9663)GLVNLQANAAAPVGNAPVK.S	IMDST*EWLGTMFQET*GLVNLQANAAAPVGNAPVK	[0,51.05,]	0.457507	[T57], T67
Dam1_20130201_7.9212.9212.3	6.0246	0.4986	100	3102.38	3100.37	-1.1	67397.9	1	7.92464	4.84	59.1	67	[YKL052C ASK1 SGDID:S000001535, Chr XI from 340546-339668, Genome Release 64-1-1, reverse complement, Verified ORF, "Essential subunit of the Dam1 complex (aka DASH complex), couples kinetochores to the force produced by MT depolymerization thereby aiding	R.DVHSMFNNDSIDDFHT(79.9663)ANITSTGQILK.L	DVHSMFNNDSIDDFHT*ANITSTGQILK	35.63,	0.999991	T140
Dam1_20130201_8.19099.19099.4	4.4479	0.3058	100	4846.11	4843.13	-6.3	13902	5	6.40815	4.31	29.9	3	[YKL052C ASK1 SGDID:S000001535, Chr XI from 340546-339668, Genome Release 64-1-1, reverse complement, Verified ORF, "Essential subunit of the Dam1 complex (aka DASH complex), couples kinetochores to the force produced by MT depolymerization thereby aiding	R.DVHSMFNNDSIDDFHTANITST(79.9663)GQILKLPDSSDEDTGSEAVPSR.E	DVHSMFNNDSIDDFHTANITS*TGQILKLPDSSDEDTGSEAVPSR	0,	0.999976	[S145]
Dam1_20130201_9.869.869.4	5.2484	0.4099	100	4845.14	4843.13	0.6	30794.3	46	6.41636	4.31	26.9	5	[YKL052C ASK1 SGDID:S000001535, Chr XI from 340546-339668, Genome Release 64-1-1, reverse complement, Verified ORF, "Essential subunit of the Dam1 complex (aka DASH complex), couples kinetochores to the force produced by MT depolymerization thereby aiding	R.DVHSMFNNDSIDDFHT(79.9663)ANITSTGQILKLPDSSDEDTGSEAVPSR.E	DVHSMFNNDSIDDFHT*ANITSTGQILKLPDSSDEDTGSEAVPSR	3.83,	0.999518	[T140]
Dam1_Mps1_TiO2enriched_1.11386.11386.2	2.9114	0.4003	99.3	3102.36	3100.37	-4.5	14097	2	5.98143	4.84	59.3	1	[YKL052C ASK1 SGDID:S000001535, Chr XI from 340546-339668, Genome Release 64-1-1, reverse complement, Verified ORF, "Essential subunit of the Dam1 complex (aka DASH complex), couples kinetochores to the force produced by MT depolymerization thereby aiding in chromosome segregation; phosphorylated during the cell cycle by cyclin-dependent kinases" ]	R.DVHSMFNNDSIDDFHTANIT(79.9663)STGQILK.L	DVHSMFNNDSIDDFHTANIT*STGQILK	16.2,	0.999979	T144
Dam1_Mps1_TiO2enriched_1.12455.12455.2	5.2222	0.5381	100	3184.33	3180.34	-7	220769	1	9.20289	4.84	87	1	[YKL052C ASK1 SGDID:S000001535, Chr XI from 340546-339668, Genome Release 64-1-1, reverse complement, Verified ORF, "Essential subunit of the Dam1 complex (aka DASH complex), couples kinetochores to the force produced by MT depolymerization thereby aiding in chromosome segregation; phosphorylated during the cell cycle by cyclin-dependent kinases" ]	R.DVHSMFNNDSIDDFHT(79.9663)ANIT(79.9663)STGQILK.L	DVHSMFNNDSIDDFHT*ANIT*STGQILK	[31.81,19.21,]	0.999891	T140, T144
Dam1_Mps1_TiO2enriched_1.11611.11611.3	4.7046	0.3412	99	3181.35	3180.34	2.6	22119.7	1	5.7751	4.84	47.7	1	[YKL052C ASK1 SGDID:S000001535, Chr XI from 340546-339668, Genome Release 64-1-1, reverse complement, Verified ORF, "Essential subunit of the Dam1 complex (aka DASH complex), couples kinetochores to the force produced by MT depolymerization thereby aiding in chromosome segregation; phosphorylated during the cell cycle by cyclin-dependent kinases" ]	R.DVHSMFNNDSIDDFHT(79.9663)ANITST(79.9663)GQILK.L	DVHSMFNNDSIDDFHT*ANITST*GQILK	[12.51,7.71,]	0.997563	[T140], [T146]
Dam1_Mps1_TiO2enriched_1.13255.13255.3	4.9129	0.4341	100	3182.34	3180.34	-1.1	44613	42	7.23471	4.84	38.5	1	[YKL052C ASK1 SGDID:S000001535, Chr XI from 340546-339668, Genome Release 64-1-1, reverse complement, Verified ORF, "Essential subunit of the Dam1 complex (aka DASH complex), couples kinetochores to the force produced by MT depolymerization thereby aiding in chromosome segregation; phosphorylated during the cell cycle by cyclin-dependent kinases" ]	R.DVHSMFNNDSIDDFHTANITS(79.9663)T(79.9663)GQILK.L	DVHSMFNNDSIDDFHT*ANIT*STGQILK	[7.96,9.82,]	0.999975	[T140], [T144]
Dam1_Mps1_TiO2enriched_1.13745.13745.3	4.7961	0.4444	100	3266.32	3260.3	-2	326198	4	7.23829	4.84	43.5	1	[YKL052C ASK1 SGDID:S000001535, Chr XI from 340546-339668, Genome Release 64-1-1, reverse complement, Verified ORF, "Essential subunit of the Dam1 complex (aka DASH complex), couples kinetochores to the force produced by MT depolymerization thereby aiding in chromosome segregation; phosphorylated during the cell cycle by cyclin-dependent kinases" ]	R.DVHSMFNNDSIDDFHT(79.9663)ANIT(79.9663)ST(79.9663)GQILK.L	DVHSMFNNDS*IDDFHTANIT*ST*GQILK	[13.29,9.82,19.84,]	0.315366	S134, [T144], T146
Dam1_Mps1_TiO2enriched_1.14668.14668.4	4.3632	0.4676	100	5004.07	5003.06	0.6	25879.7	2	8.09923	4.31	31.4	1	[YKL052C ASK1 SGDID:S000001535, Chr XI from 340546-339668, Genome Release 64-1-1, reverse complement, Verified ORF, "Essential subunit of the Dam1 complex (aka DASH complex), couples kinetochores to the force produced by MT depolymerization thereby aiding in chromosome segregation; phosphorylated during the cell cycle by cyclin-dependent kinases" ]	R.DVHSMFNNDS(79.9663)IDDFHTANIT(79.9663)S(79.9663)TGQILKLPDSSDEDTGSEAVPSR.E	DVHSMFNNDS*IDDFHTANIT*S*TGQILKLPDSSDEDTGSEAVPSR	[22.21,22.87,18.87,]	0.999965	S134, T144, S145
Dam1_Mps1_TiO2enriched_1.14406.14406.3	4.3541	0.3735	100	2912.17	2909.15	2.1	50482.8	1	6.24035	4.72	63.6	1	[YKL052C ASK1 SGDID:S000001535, Chr XI from 340546-339668, Genome Release 64-1-1, reverse complement, Verified ORF, "Essential subunit of the Dam1 complex (aka DASH complex), couples kinetochores to the force produced by MT depolymerization thereby aiding in chromosome segregation; phosphorylated during the cell cycle by cyclin-dependent kinases" ]	H.SMFNNDSIDDFHT(79.9663)ANIT(79.9663)ST(79.9663)GQILK.L	SMFNNDSIDDFHT*ANIT*ST*GQILK	[30.34,9.82,6.97,]	0.999893	T140, [T144], [T146]
Dam1_Mps1_TiO2enriched_1.4623.4623.2	4.2275	0.4532	100	2030.82	2029.81	-0.4	40381.5	1	6.57485	4.14	61.5	1	[YKL052C ASK1 SGDID:S000001535, Chr XI from 340546-339668, Genome Release 64-1-1, reverse complement, Verified ORF, "Essential subunit of the Dam1 complex (aka DASH complex), couples kinetochores to the force produced by MT depolymerization thereby aiding in chromosome segregation; phosphorylated during the cell cycle by cyclin-dependent kinases" ]	F.NNDSIDDFHT(79.9663)ANITSTGQ.I	NNDSIDDFHT*ANITSTGQ	31.1,	0.998166	T140
Dam1_Mps1_TiO2enriched_1.4909.4909.2	3.9095	0.3376	99.3	2029.81	2029.81	-3.2	23408.4	1	5.94231	4.14	60	1	[YKL052C ASK1 SGDID:S000001535, Chr XI from 340546-339668, Genome Release 64-1-1, reverse complement, Verified ORF, "Essential subunit of the Dam1 complex (aka DASH complex), couples kinetochores to the force produced by MT depolymerization thereby aiding in chromosome segregation; phosphorylated during the cell cycle by cyclin-dependent kinases" ]	F.NNDSIDDFHTANIT(79.9663)STGQ.I	NNDSIDDFHTANITS*TGQ	0,	0.999892	[S145]
Dam1_Mps1_TiO2enriched_1.10700.10700.2	3.5868	0.391	99.2	2255.98	2255.98	-2.2	20003.6	2	8.21772	4.14	55.2	1	[YKL052C ASK1 SGDID:S000001535, Chr XI from 340546-339668, Genome Release 64-1-1, reverse complement, Verified ORF, "Essential subunit of the Dam1 complex (aka DASH complex), couples kinetochores to the force produced by MT depolymerization thereby aiding in chromosome segregation; phosphorylated during the cell cycle by cyclin-dependent kinases" ]	F.NNDSIDDFHTANITS(79.9663)TGQIL.K	NNDSIDDFHTANITST*GQIL	7.38,	0.258857	[T146]
Dam1_Mps1_TiO2enriched_1.10742.10742.2	6.268	0.3721	100	2259.99	2255.98	-0.6	189860	1	8.06012	4.14	69.2	3	[YKL052C ASK1 SGDID:S000001535, Chr XI from 340546-339668, Genome Release 64-1-1, reverse complement, Verified ORF, "Essential subunit of the Dam1 complex (aka DASH complex), couples kinetochores to the force produced by MT depolymerization thereby aiding in chromosome segregation; phosphorylated during the cell cycle by cyclin-dependent kinases" ]	F.NNDSIDDFHT(79.9663)ANITSTGQIL.K	NNDSIDDFHT*ANITSTGQIL	20.8,	0.216539	T140
Dam1_Mps1_TiO2enriched_1.11360.11360.2	5.707	0.4789	100	2256.98	2255.98	-4.3	60288	1	8.62373	4.14	88	1	[YKL052C ASK1 SGDID:S000001535, Chr XI from 340546-339668, Genome Release 64-1-1, reverse complement, Verified ORF, "Essential subunit of the Dam1 complex (aka DASH complex), couples kinetochores to the force produced by MT depolymerization thereby aiding in chromosome segregation; phosphorylated during the cell cycle by cyclin-dependent kinases" ]	F.NNDSIDDFHTANIT(79.9663)STGQIL.K	NNDSIDDFHTANIT*STGQIL	26.38,	0.999982	T144
Dam1_Mps1_TiO2enriched_1.13317.13317.2	5.2668	0.3918	100	2336.95	2335.95	0	1.83524e+06	1	7.80839	4.14	92.9	6	[YKL052C ASK1 SGDID:S000001535, Chr XI from 340546-339668, Genome Release 64-1-1, reverse complement, Verified ORF, "Essential subunit of the Dam1 complex (aka DASH complex), couples kinetochores to the force produced by MT depolymerization thereby aiding in chromosome segregation; phosphorylated during the cell cycle by cyclin-dependent kinases" ]	F.NNDSIDDFHT(79.9663)ANIT(79.9663)STGQIL.K	NNDSIDDFHT*ANIT*STGQIL	[48.83,11.51,]	0.999995	T140, [T144]
Dam1_Mps1_TiO2enriched_1.13574.13574.2	6.3644	0.5101	100	2338.94	2335.95	-5.9	90366.4	2	8.98556	4.14	80.8	4	[YKL052C ASK1 SGDID:S000001535, Chr XI from 340546-339668, Genome Release 64-1-1, reverse complement, Verified ORF, "Essential subunit of the Dam1 complex (aka DASH complex), couples kinetochores to the force produced by MT depolymerization thereby aiding in chromosome segregation; phosphorylated during the cell cycle by cyclin-dependent kinases" ]	F.NNDSIDDFHT(79.9663)ANITS(79.9663)TGQIL.K	NNDSIDDFHT*ANIT*STGQIL	[37.44,19.33,]	0.999992	T140, T144
Dam1_Mps1_TiO2enriched_1.16134.16134.2	4.7753	0.3834	98.6	2416.92	2415.91	1.3	207393	1	8.87631	4.14	79.2	3	[YKL052C ASK1 SGDID:S000001535, Chr XI from 340546-339668, Genome Release 64-1-1, reverse complement, Verified ORF, "Essential subunit of the Dam1 complex (aka DASH complex), couples kinetochores to the force produced by MT depolymerization thereby aiding in chromosome segregation; phosphorylated during the cell cycle by cyclin-dependent kinases" ]	F.NNDSIDDFHT(79.9663)ANIT(79.9663)ST(79.9663)GQIL.K	NNDSIDDFHT*ANIT*ST*GQIL	[65.61,13.24,18.42,]	0.999994	T140, T144, T146
Dam1_Mps1_TiO2enriched_1.8371.8371.2	3.199	0.4487	99	2155.99	2155.99	-2.3	38844.9	1	6.69325	4.72	60.7	1	[YKL052C ASK1 SGDID:S000001535, Chr XI from 340546-339668, Genome Release 64-1-1, reverse complement, Verified ORF, "Essential subunit of the Dam1 complex (aka DASH complex), couples kinetochores to the force produced by MT depolymerization thereby aiding in chromosome segregation; phosphorylated during the cell cycle by cyclin-dependent kinases" ]	N.DSIDDFHTANIT(79.9663)STGQILK.L	DSIDDFHTANIT*STGQILK	19.33,	0.999992	T140
Dam1_Mps1_TiO2enriched_1.9455.9455.3	4.0803	0.4187	100	2236.96	2235.96	0.5	13550.2	2	7.41789	4.72	66	1	[YKL052C ASK1 SGDID:S000001535, Chr XI from 340546-339668, Genome Release 64-1-1, reverse complement, Verified ORF, "Essential subunit of the Dam1 complex (aka DASH complex), couples kinetochores to the force produced by MT depolymerization thereby aiding in chromosome segregation; phosphorylated during the cell cycle by cyclin-dependent kinases" ]	N.DSIDDFHT(79.9663)ANITS(79.9663)TGQILK.L	DSIDDFHT*ANITS*TGQILK	[16.49,0,]	0.999981	T140, [S145]
Dam1_Mps1_TiO2enriched_1.2315.2315.2	4.1648	0.502	100	1969.84	1969.84	-0.1	25991.9	1	8.13498	4.25	75.9	1	[YKL052C ASK1 SGDID:S000001535, Chr XI from 340546-339668, Genome Release 64-1-1, reverse complement, Verified ORF, "Essential subunit of the Dam1 complex (aka DASH complex), couples kinetochores to the force produced by MT depolymerization thereby aiding in chromosome segregation; phosphorylated during the cell cycle by cyclin-dependent kinases" ]	L.KLPDSSDEDT(79.9663)GSEAVPSR.E	KLPDSSDEDT*GSEAVPSR	43.03,	0.999995	T160
Dam1_Mps1_TiO2enriched_1.2673.2673.4	3.6519	0.3556	98.6	4540.93	4538.92	1	833096	2	6.29652	4.07	34.7	1	[YKL052C ASK1 SGDID:S000001535, Chr XI from 340546-339668, Genome Release 64-1-1, reverse complement, Verified ORF, "Essential subunit of the Dam1 complex (aka DASH complex), couples kinetochores to the force produced by MT depolymerization thereby aiding in chromosome segregation; phosphorylated during the cell cycle by cyclin-dependent kinases" ]	L.KLPDSSDEDTGSEAVPSREQTDLTGEGHGGADDEQDEST(79.9663)IQR.Q	KLPDSSDEDTGSEAVPSREQTDLTGEGHGGADDEQDEST*IQR	7.93,	0.999977	[T189]
Dam1_Mps1_TiO2enriched_1.2682.2682.3	3.8906	0.4177	100	4668.98	4666.98	-1.2	215533	12	5.31022	4.07	34.8	1	[YKL052C ASK1 SGDID:S000001535, Chr XI from 340546-339668, Genome Release 64-1-1, reverse complement, Verified ORF, "Essential subunit of the Dam1 complex (aka DASH complex), couples kinetochores to the force produced by MT depolymerization thereby aiding in chromosome segregation; phosphorylated during the cell cycle by cyclin-dependent kinases" ]	L.KLPDSSDEDTGSEAVPSREQTDLTGEGHGGADDEQDEST(79.9663)IQRQ.S	KLPDSSDEDTGSEAVPSREQTDLTGEGHGGADDEQDEST*IQRQ	0,	0.999992	[T189]
Dam1_Mps1_TiO2enriched_1.2820.2820.4	5.0857	0.3698	100	4749.95	4746.94	-0.9	246332	3	6.26	4.07	33.8	1	[YKL052C ASK1 SGDID:S000001535, Chr XI from 340546-339668, Genome Release 64-1-1, reverse complement, Verified ORF, "Essential subunit of the Dam1 complex (aka DASH complex), couples kinetochores to the force produced by MT depolymerization thereby aiding in chromosome segregation; phosphorylated during the cell cycle by cyclin-dependent kinases" ]	L.KLPDSSDEDTGSEAVPSREQT(79.9663)DLTGEGHGGADDEQDEST(79.9663)IQRQ.S	KLPDSSDEDTGSEAVPS*REQTDLTGEGHGGADDEQDEST*IQRQ	[6.88,7.38,]	0.999986	[S167], [T189]
Dam1_Mps1_TiO2enriched_1.2842.2842.4	3.986	0.5281	100	4746.92	4746.94	-4.5	227567	54	8.23248	4.07	31.7	1	[YKL052C ASK1 SGDID:S000001535, Chr XI from 340546-339668, Genome Release 64-1-1, reverse complement, Verified ORF, "Essential subunit of the Dam1 complex (aka DASH complex), couples kinetochores to the force produced by MT depolymerization thereby aiding in chromosome segregation; phosphorylated during the cell cycle by cyclin-dependent kinases" ]	L.KLPDSSDEDTGSEAVPS(79.9663)REQTDLTGEGHGGADDEQDES(79.9663)TIQRQ.S	KLPDSSDEDTGSEAVPS*REQTDLTGEGHGGADDEQDES*TIQRQ	[8.31,8.63,]	0.5	[S167], [S188]
Dam1_Mps1_TiO2enriched_1.2707.2707.4	4.3892	0.3738	100	4756.04	4754.01	4.9	191074	62	6.81567	4.07	31.2	1	[YKL052C ASK1 SGDID:S000001535, Chr XI from 340546-339668, Genome Release 64-1-1, reverse complement, Verified ORF, "Essential subunit of the Dam1 complex (aka DASH complex), couples kinetochores to the force produced by MT depolymerization thereby aiding in chromosome segregation; phosphorylated during the cell cycle by cyclin-dependent kinases" ]	L.KLPDSSDEDTGSEAVPSREQTDLTGEGHGGADDEQDEST(79.9663)IQRQS.R	KLPDSSDEDTGSEAVPSREQTDLTGEGHGGADDEQDES*TIQRQS	7.48,	0.999969	[S188]
Dam1_Mps1_TiO2enriched_1.2501.2501.5	3.4655	0.4064	99.2	4912.12	4910.11	0.2	5.56889e+06	76	5.31435	4.21	31.5	1	[YKL052C ASK1 SGDID:S000001535, Chr XI from 340546-339668, Genome Release 64-1-1, reverse complement, Verified ORF, "Essential subunit of the Dam1 complex (aka DASH complex), couples kinetochores to the force produced by MT depolymerization thereby aiding in chromosome segregation; phosphorylated during the cell cycle by cyclin-dependent kinases" ]	L.KLPDSSDEDTGSEAVPSREQTDLTGEGHGGADDEQDES(79.9663)TIQRQSR.K	KLPDSSDEDTGSEAVPSREQTDLTGEGHGGADDEQDEST*IQRQSR	0,	0.999988	[T189]
Dam1_Mps1_TiO2enriched_1.2607.2607.4	4.1117	0.3511	99.2	4992.09	4990.08	0.5	377999	29	4.37943	4.21	31.5	1	[YKL052C ASK1 SGDID:S000001535, Chr XI from 340546-339668, Genome Release 64-1-1, reverse complement, Verified ORF, "Essential subunit of the Dam1 complex (aka DASH complex), couples kinetochores to the force produced by MT depolymerization thereby aiding in chromosome segregation; phosphorylated during the cell cycle by cyclin-dependent kinases" ]	L.KLPDSSDEDT(79.9663)GSEAVPSREQTDLTGEGHGGADDEQDES(79.9663)TIQRQSR.K	KLPDSSDEDT*GSEAVPS*REQTDLTGEGHGGADDEQDESTIQRQSR	[10,19.72,]	0.99999	[T160], S167
Dam1_Mps1_TiO2enriched_1.2527.2527.2	4.499	0.331	99.2	1845.75	1841.74	-2.8	818670	1	6.31953	3.86	77.8	2	[YKL052C ASK1 SGDID:S000001535, Chr XI from 340546-339668, Genome Release 64-1-1, reverse complement, Verified ORF, "Essential subunit of the Dam1 complex (aka DASH complex), couples kinetochores to the force produced by MT depolymerization thereby aiding in chromosome segregation; phosphorylated during the cell cycle by cyclin-dependent kinases" ]	K.LPDSSDEDT(79.9663)GSEAVPSR.E	LPDSSDEDT*GSEAVPSR	22.01,	0.15407	T160
Dam1_Mps1_TiO2enriched_1.2361.2361.2	3.2847	0.3794	99.3	2670.07	2668.06	-0.9	911202	1	5.63733	3.95	71.9	1	[YKL052C ASK1 SGDID:S000001535, Chr XI from 340546-339668, Genome Release 64-1-1, reverse complement, Verified ORF, "Essential subunit of the Dam1 complex (aka DASH complex), couples kinetochores to the force produced by MT depolymerization thereby aiding in chromosome segregation; phosphorylated during the cell cycle by cyclin-dependent kinases" ]	R.EQTDLTGEGHGGADDEQDEST(79.9663)IQR.Q	EQTDLTGEGHGGADDEQDEST*IQR	13.19,	0.970854	T189
Dam1_Mps1_TiO2enriched_1.2471.2471.3	4.0779	0.4354	100	2669.07	2668.06	-1	69996	1	7.09413	3.95	48.5	1	[YKL052C ASK1 SGDID:S000001535, Chr XI from 340546-339668, Genome Release 64-1-1, reverse complement, Verified ORF, "Essential subunit of the Dam1 complex (aka DASH complex), couples kinetochores to the force produced by MT depolymerization thereby aiding in chromosome segregation; phosphorylated during the cell cycle by cyclin-dependent kinases" ]	R.EQTDLT(79.9663)GEGHGGADDEQDESTIQR.Q	EQTDLT*GEGHGGADDEQDESTIQR	49.15,	0.996907	T174
Dam1_Mps1_TiO2enriched_1.2263.2263.3	5.3449	0.376	100	3040.26	3039.26	0.3	1.3916e+06	1	7.53824	4.2	46.6	1	[YKL052C ASK1 SGDID:S000001535, Chr XI from 340546-339668, Genome Release 64-1-1, reverse complement, Verified ORF, "Essential subunit of the Dam1 complex (aka DASH complex), couples kinetochores to the force produced by MT depolymerization thereby aiding in chromosome segregation; phosphorylated during the cell cycle by cyclin-dependent kinases" ]	R.EQTDLTGEGHGGADDEQDEST(79.9663)IQRQSR.K	EQTDLTGEGHGGADDEQDEST*IQRQSR	5.83,	0.998531	[T189]
Dam1_Mps1_TiO2enriched_1.2536.2536.4	4.5457	0.3192	99.2	4084.87	4082.86	0	840675	2	6.78702	5.61	44.1	1	[YKL052C ASK1 SGDID:S000001535, Chr XI from 340546-339668, Genome Release 64-1-1, reverse complement, Verified ORF, "Essential subunit of the Dam1 complex (aka DASH complex), couples kinetochores to the force produced by MT depolymerization thereby aiding in chromosome segregation; phosphorylated during the cell cycle by cyclin-dependent kinases" ]	L.KQGHHHPKGQADDNNEGPDEEES(79.9663)TKEVPKPGTIIHF.S	KQGHHHPKGQADDNNEGPDEEES*TKEVPKPGTIIHF	0,	0.999987	[S275]
Dam1_Mps1_TiO2enriched_1.3133.3133.4	3.7349	0.3918	99.1	3633.63	3632.63	0.7	323250	1	6.81607	4.86	38.2	1	[YKL052C ASK1 SGDID:S000001535, Chr XI from 340546-339668, Genome Release 64-1-1, reverse complement, Verified ORF, "Essential subunit of the Dam1 complex (aka DASH complex), couples kinetochores to the force produced by MT depolymerization thereby aiding in chromosome segregation; phosphorylated during the cell cycle by cyclin-dependent kinases" ]	H.HHPKGQADDNNEGPDEEES(79.9663)TKEVPKPGTIIHF.S	HHPKGQADDNNEGPDEEES*TKEVPKPGTIIHF	0,	0.999975	[S275]
Dam1_Mps1_TiO2enriched_1.5960.5960.2	2.3941	0.4115	98.2	3134.36	3133.36	-3.3	33313.5	1	5.18209	4.2	60	1	[YKL052C ASK1 SGDID:S000001535, Chr XI from 340546-339668, Genome Release 64-1-1, reverse complement, Verified ORF, "Essential subunit of the Dam1 complex (aka DASH complex), couples kinetochores to the force produced by MT depolymerization thereby aiding in chromosome segregation; phosphorylated during the cell cycle by cyclin-dependent kinases" ]	K.GQADDNNEGPDEEES(79.9663)TKEVPKPGTIIHF.S	GQADDNNEGPDEEES*TKEVPKPGTIIHF	10.28,	0.999991	[S275]
Dam1_Mps1_TiO2enriched_1.5947.5947.3	5.0208	0.3169	99	3134.37	3133.36	1.4	930944	2	7.17193	4.2	50.7	4	[YKL052C ASK1 SGDID:S000001535, Chr XI from 340546-339668, Genome Release 64-1-1, reverse complement, Verified ORF, "Essential subunit of the Dam1 complex (aka DASH complex), couples kinetochores to the force produced by MT depolymerization thereby aiding in chromosome segregation; phosphorylated during the cell cycle by cyclin-dependent kinases" ]	K.GQADDNNEGPDEEEST(79.9663)KEVPKPGTIIHF.S	GQADDNNEGPDEEES*TKEVPKPGTIIHF	5.88,	0.99999	[S275]
Dam1_Mps1_TiO2enriched_1.6419.6419.3	4.3177	0.4397	100	3134.37	3133.36	0.4	127214	3	6.2949	4.2	49.2	1	[YKL052C ASK1 SGDID:S000001535, Chr XI from 340546-339668, Genome Release 64-1-1, reverse complement, Verified ORF, "Essential subunit of the Dam1 complex (aka DASH complex), couples kinetochores to the force produced by MT depolymerization thereby aiding in chromosome segregation; phosphorylated during the cell cycle by cyclin-dependent kinases" ]	K.GQADDNNEGPDEEESTKEVPKPGT(79.9663)IIHF.S	GQADDNNEGPDEEEST*KEVPKPGTIIHF	8.36,	0.999989	[T276]
Dam1_Mps1_TiO2enriched_1.3979.3979.3	3.5921	0.4974	100	3591.59	3591.59	0.1	479442	2	7.49178	4.42	68.5	1	[YKL052C ASK1 SGDID:S000001535, Chr XI from 340546-339668, Genome Release 64-1-1, reverse complement, Verified ORF, "Essential subunit of the Dam1 complex (aka DASH complex), couples kinetochores to the force produced by MT depolymerization thereby aiding in chromosome segregation; phosphorylated during the cell cycle by cyclin-dependent kinases" ]	K.GQADDNNEGPDEEES(79.9663)TKEVPKPGTIIHFSTNR.-	GQADDNNEGPDEEEST*KEVPKPGTIIHFSTNR	6.59,	0.999986	[T276]
Dam1_Mps1_TiO2enriched_1.4143.4143.3	4.7243	0.4417	100	3596.6	3591.59	-1.3	433326	1	7.09007	4.42	51.4	5	[YKL052C ASK1 SGDID:S000001535, Chr XI from 340546-339668, Genome Release 64-1-1, reverse complement, Verified ORF, "Essential subunit of the Dam1 complex (aka DASH complex), couples kinetochores to the force produced by MT depolymerization thereby aiding in chromosome segregation; phosphorylated during the cell cycle by cyclin-dependent kinases" ]	K.GQADDNNEGPDEEEST(79.9663)KEVPKPGTIIHFSTNR.-	GQADDNNEGPDEEEST*KEVPKPGTIIHFSTNR	7.48,	0.999985	[T276]
Dam1_Mps1_TiO2enriched_1.5592.5592.3	3.1537	0.4376	99.2	3676.56	3671.55	-3.2	316985	8	5.69388	4.42	39.4	1	[YKL052C ASK1 SGDID:S000001535, Chr XI from 340546-339668, Genome Release 64-1-1, reverse complement, Verified ORF, "Essential subunit of the Dam1 complex (aka DASH complex), couples kinetochores to the force produced by MT depolymerization thereby aiding in chromosome segregation; phosphorylated during the cell cycle by cyclin-dependent kinases" ]	K.GQADDNNEGPDEEES(79.9663)TKEVPKPGT(79.9663)IIHFSTNR.-	GQADDNNEGPDEEES*TKEVPKPGT*IIHFSTNR	[0,66.04,]	0.999993	[S275], T284
Dam1_20130201_9.14745.14745.4	4.1345	0.3522	100	3593.59	3591.59	0.3	10999.3	1	5.4974	4.42	38	2	[YKL052C ASK1 SGDID:S000001535, Chr XI from 340546-339668, Genome Release 64-1-1, reverse complement, Verified ORF, "Essential subunit of the Dam1 complex (aka DASH complex), couples kinetochores to the force produced by MT depolymerization thereby aiding	K.GQADDNNEGPDEEES(79.9663)TKEVPKPGTIIHFSTNR.-	GQADDNNEGPDEEES*TKEVPKPGTIIHFSTNR	12.32,	0.999443	[S275]
Dam1_20130201_9.15163.15163.4	4.2116	0.4773	100	3592.6	3591.59	2.3	26200.7	76	7.31409	4.42	28	3	[YKL052C ASK1 SGDID:S000001535, Chr XI from 340546-339668, Genome Release 64-1-1, reverse complement, Verified ORF, "Essential subunit of the Dam1 complex (aka DASH complex), couples kinetochores to the force produced by MT depolymerization thereby aiding	K.GQADDNNEGPDEEEST(79.9663)KEVPKPGTIIHFSTNR.-	GQADDNNEGPDEEEST*KEVPKPGTIIHFSTNR	5.92,	0.999949	[T276]
Dam1_Mps1_TiO2enriched_1.11251.11251.2	4.4772	0.4053	98.6	2946.37	2944.37	-2.1	28569.3	1	7.20155	4.12	75.9	1	[YDR016C DAD1 SGDID:S000002423, Chr IV from 478758-478474, Genome Release 64-1-1, reverse complement, Verified ORF, "Essential subunit of the Dam1 complex (aka DASH complex), couples kinetochores to the force produced by MT depolymerization thereby aiding in chromosome segregation; is transferred to the kinetochore prior to mitosis" ]	W.KTLYDGLESLSDEAPIDEQPT(79.9663)LSQSK.T	KTLYDGLESLSDEAPIDEQPT*LSQSK	38.42,	0.999951	T87
Dam1_Mps1_TiO2enriched_1.9053.9053.2	3.55	0.4478	98.8	3174.53	3173.51	3.9	20749.8	1	7.06021	4.42	89.7	1	[YDR016C DAD1 SGDID:S000002423, Chr IV from 478758-478474, Genome Release 64-1-1, reverse complement, Verified ORF, "Essential subunit of the Dam1 complex (aka DASH complex), couples kinetochores to the force produced by MT depolymerization thereby aiding in chromosome segregation; is transferred to the kinetochore prior to mitosis" ]	W.KTLYDGLESLSDEAPIDEQPT(79.9663)LSQSKTK.-	KTLYDGLESLSDEAPIDEQPT*LSQSKTK	32.4,	0.999992	T87
Dam1_Mps1_TiO2enriched_1.9082.9082.2	3.3583	0.3389	99.4	3174.51	3173.51	-2.6	33172	2	6.60542	4.42	74.1	2	[YDR016C DAD1 SGDID:S000002423, Chr IV from 478758-478474, Genome Release 64-1-1, reverse complement, Verified ORF, "Essential subunit of the Dam1 complex (aka DASH complex), couples kinetochores to the force produced by MT depolymerization thereby aiding in chromosome segregation; is transferred to the kinetochore prior to mitosis" ]	W.KTLYDGLESLSDEAPIDEQPTLS(79.9663)QSKTK.-	KTLYDGLESLSDEAPIDEQPT*LSQSKTK	24.75,	0.999993	T87
Dam1_Mps1_TiO2enriched_1.13634.13634.2	5.0351	0.4784	100	2817.28	2816.28	-1.5	16455.1	1	8.12016	3.8	79.3	5	[YDR016C DAD1 SGDID:S000002423, Chr IV from 478758-478474, Genome Release 64-1-1, reverse complement, Verified ORF, "Essential subunit of the Dam1 complex (aka DASH complex), couples kinetochores to the force produced by MT depolymerization thereby aiding in chromosome segregation; is transferred to the kinetochore prior to mitosis" ]	K.TLYDGLESLSDEAPIDEQPT(79.9663)LSQSK.T	TLYDGLESLSDEAPIDEQPT*LSQSK	26.38,	0.999909	T87
Dam1_Mps1_TiO2enriched_1.11906.11906.2	4.1391	0.4953	100	2716.23	2715.23	-2.3	14178.1	2	9.80588	3.8	82.8	1	[YDR016C DAD1 SGDID:S000002423, Chr IV from 478758-478474, Genome Release 64-1-1, reverse complement, Verified ORF, "Essential subunit of the Dam1 complex (aka DASH complex), couples kinetochores to the force produced by MT depolymerization thereby aiding in chromosome segregation; is transferred to the kinetochore prior to mitosis" ]	T.LYDGLESLSDEAPIDEQPTLS(79.9663)QSK.T	LYDGLESLSDEAPIDEQPT*LSQSK	38.42,	0.999945	T87
Dam1_Mps1_TiO2enriched_1.11906.11906.2	4.1389	0.4953	100	2716.23	2715.23	-2.3	14178.1	1	9.80547	3.8	89.7	1	[YDR016C DAD1 SGDID:S000002423, Chr IV from 478758-478474, Genome Release 64-1-1, reverse complement, Verified ORF, "Essential subunit of the Dam1 complex (aka DASH complex), couples kinetochores to the force produced by MT depolymerization thereby aiding in chromosome segregation; is transferred to the kinetochore prior to mitosis" ]	T.LYDGLESLSDEAPIDEQPT(79.9663)LSQSK.T	LYDGLESLSDEAPIDEQPT*LSQSK	38.42,	0.999945	T87
Dam1_Mps1_TiO2enriched_1.10204.10204.2	3.3354	0.357	99.3	2603.15	2602.14	-0.3	6101.8	1	8.04369	3.8	67.9	1	[YDR016C DAD1 SGDID:S000002423, Chr IV from 478758-478474, Genome Release 64-1-1, reverse complement, Verified ORF, "Essential subunit of the Dam1 complex (aka DASH complex), couples kinetochores to the force produced by MT depolymerization thereby aiding in chromosome segregation; is transferred to the kinetochore prior to mitosis" ]	L.YDGLESLSDEAPIDEQPT(79.9663)LSQSK.T	YDGLESLSDEAPIDEQPT*LSQSK	19.94,	0.940499	T87
Dam1_Mps1_TiO2enriched_1.7607.7607.3	5.3084	0.3736	100	2832.3	2831.29	3.1	46635.8	1	7.90939	4.12	56.2	1	[YDR016C DAD1 SGDID:S000002423, Chr IV from 478758-478474, Genome Release 64-1-1, reverse complement, Verified ORF, "Essential subunit of the Dam1 complex (aka DASH complex), couples kinetochores to the force produced by MT depolymerization thereby aiding in chromosome segregation; is transferred to the kinetochore prior to mitosis" ]	L.YDGLESLSDEAPIDEQPT(79.9663)LSQSKTK.-	YDGLESLSDEAPIDEQPT*LSQSKTK	10.91,	0.99962	[T87]
Dam1_Mps1_TiO2enriched_1.9581.9581.2	5.5211	0.4351	100	2441.09	2439.08	1.8	38950	1	9.1277	3.8	71.4	2	[YDR016C DAD1 SGDID:S000002423, Chr IV from 478758-478474, Genome Release 64-1-1, reverse complement, Verified ORF, "Essential subunit of the Dam1 complex (aka DASH complex), couples kinetochores to the force produced by MT depolymerization thereby aiding in chromosome segregation; is transferred to the kinetochore prior to mitosis" ]	Y.DGLESLSDEAPIDEQPT(79.9663)LSQSK.T	DGLESLSDEAPIDEQPT*LSQSK	24.84,	0.997241	T87
Dam1_Mps1_TiO2enriched_1.6931.6931.2	3.2547	0.4017	99.2	2669.22	2668.22	-1.3	19832.7	1	6.79777	4.12	62.1	1	[YDR016C DAD1 SGDID:S000002423, Chr IV from 478758-478474, Genome Release 64-1-1, reverse complement, Verified ORF, "Essential subunit of the Dam1 complex (aka DASH complex), couples kinetochores to the force produced by MT depolymerization thereby aiding in chromosome segregation; is transferred to the kinetochore prior to mitosis" ]	Y.DGLESLSDEAPIDEQPT(79.9663)LSQSKTK.-	DGLESLSDEAPIDEQPT*LSQSKTK	24.15,	0.999994	T87
Dam1_Mps1_TiO2enriched_1.3244.3244.2	3.3891	0.4568	98.8	1738.75	1737.76	-3.8	198024	1	8.22262	3.96	95.7	1	[YDR016C DAD1 SGDID:S000002423, Chr IV from 478758-478474, Genome Release 64-1-1, reverse complement, Verified ORF, "Essential subunit of the Dam1 complex (aka DASH complex), couples kinetochores to the force produced by MT depolymerization thereby aiding in chromosome segregation; is transferred to the kinetochore prior to mitosis" ]	S.DEAPIDEQPT(79.9663)LSQSK.T	DEAPIDEQPT*LSQSK	42.65,	0.936252	T87
Dam1_20130201_10.11877.11877.3	4.7315	0.4091	100	4257.02	4254.99	3.9	17634	2	6.36126	4.57	47	1	[YGR113W DAM1 SGDID:S000003345, Chr VII from 718893-719924, Genome Release 64-1-1, Verified ORF, "Essential subunit of the Dam1 complex (aka DASH complex), couples kinetochores to the force produced by MT depolymerization thereby aiding in chromosome segr	R.RSSMGESSSLMKFADQEGLT(79.9663)SSVGEYNENTIQQLLLPK.I	RSSMGESSSLMKFADQEGLTSS*VGEYNENTIQQLLLPK	5.75,	0.99998	[S50]
Dam1_20130201_5.11993.11993.3	4.1472	0.5087	100	4100.86	4098.89	-9	2502.5	1	8.48752	4.25	29.6	1	[YGR113W DAM1 SGDID:S000003345, Chr VII from 718893-719924, Genome Release 64-1-1, Verified ORF, "Essential subunit of the Dam1 complex (aka DASH complex), couples kinetochores to the force produced by MT depolymerization thereby aiding in chromosome segr	R.SSMGESS(79.9663)SLMKFADQEGLTSSVGEYNENTIQQLLLPK.I	SSMGESS*SLMKFADQEGLTSSVGEYNENTIQQLLLPK	10.28,	0.85383	[S36]
Dam1_20130201_5.12905.12905.3	4.0397	0.3383	100	4101.91	4098.89	2.2	7293.3	1	5.77495	4.25	41.2	1	[YGR113W DAM1 SGDID:S000003345, Chr VII from 718893-719924, Genome Release 64-1-1, Verified ORF, "Essential subunit of the Dam1 complex (aka DASH complex), couples kinetochores to the force produced by MT depolymerization thereby aiding in chromosome segr	R.SSMGESSS(79.9663)LMKFADQEGLTSSVGEYNENTIQQLLLPK.I	SSMGESSS*LMKFADQEGLTSSVGEYNENTIQQLLLPK	4.49,	0.999962	[S37]
Dam1_20130201_7.11357.11357.3	4.8842	0.4854	100	4100.9	4098.89	0.1	34876.5	1	8.00024	4.25	65.2	11	[YGR113W DAM1 SGDID:S000003345, Chr VII from 718893-719924, Genome Release 64-1-1, Verified ORF, "Essential subunit of the Dam1 complex (aka DASH complex), couples kinetochores to the force produced by MT depolymerization thereby aiding in chromosome segr	R.SSMGESSSLMKFADQEGLT(79.9663)SSVGEYNENTIQQLLLPK.I	SSMGESSSLMKFADQEGLT*SSVGEYNENTIQQLLLPK	9.83,	0.99998	[T48]
Dam1_20130201_7.1326.1326.3	4.0232	0.3569	100	4101.9	4098.89	-0.4	9147.6	2	7.00852	4.25	38.6	3	[YGR113W DAM1 SGDID:S000003345, Chr VII from 718893-719924, Genome Release 64-1-1, Verified ORF, "Essential subunit of the Dam1 complex (aka DASH complex), couples kinetochores to the force produced by MT depolymerization thereby aiding in chromosome segr	R.SSMGESSSLMKFADQEGLTS(79.9663)SVGEYNENTIQQLLLPK.I	SSMGESSSLMKFADQEGLTSS*VGEYNENTIQQLLLPK	0,	0.999964	[S50]
Dam1_20130201_7.8896.8896.3	4.7489	0.4312	100	4101.89	4098.89	-2.3	13063.3	3	6.91611	4.25	41	1	[YGR113W DAM1 SGDID:S000003345, Chr VII from 718893-719924, Genome Release 64-1-1, Verified ORF, "Essential subunit of the Dam1 complex (aka DASH complex), couples kinetochores to the force produced by MT depolymerization thereby aiding in chromosome segr	R.SSMGESSSLMKFADQEGLTSS(79.9663)VGEYNENTIQQLLLPK.I	SSMGESSSLMKFADQEGLT*SSVGEYNENTIQQLLLPK	6.98,	0.999791	[T48]
Dam1_20130201_3.6352.6352.2	3.9503	0.5716	100	2975.42	2974.41	1.7	779310	1	11.1615	3.96	92.6	10	[YGR113W DAM1 SGDID:S000003345, Chr VII from 718893-719924, Genome Release 64-1-1, Verified ORF, "Essential subunit of the Dam1 complex (aka DASH complex), couples kinetochores to the force produced by MT depolymerization thereby aiding in chromosome segr	K.FADQEGLT(79.9663)SSVGEYNENTIQQLLLPK.I	FADQEGLTS*SVGEYNENTIQQLLLPK	0,	0.999994	[S49]
Dam1_20130201_5.10674.10674.2	4.6438	0.5556	100	2978.4	2974.41	-7.9	22187.1	1	10.2194	3.96	53.6	20	[YGR113W DAM1 SGDID:S000003345, Chr VII from 718893-719924, Genome Release 64-1-1, Verified ORF, "Essential subunit of the Dam1 complex (aka DASH complex), couples kinetochores to the force produced by MT depolymerization thereby aiding in chromosome segr	K.FADQEGLTS(79.9663)SVGEYNENTIQQLLLPK.I	FADQEGLTS*SVGEYNENTIQQLLLPK	0,	0.402446	[S49]
Dam1_20130201_2.7975.7975.3	5.4286	0.5076	100	2975.42	2974.41	1.5	195168	1	7.45595	3.96	60.3	22	[YGR113W DAM1 SGDID:S000003345, Chr VII from 718893-719924, Genome Release 64-1-1, Verified ORF, "Essential subunit of the Dam1 complex (aka DASH complex), couples kinetochores to the force produced by MT depolymerization thereby aiding in chromosome segr	K.FADQEGLT(79.9663)SSVGEYNENTIQQLLLPK.I	FADQEGLT*SSVGEYNENTIQQLLLPK	3.88,	0.411336	[T48]
Dam1_20130201_2.8532.8532.3	5.1295	0.4256	100	2980.42	2974.41	-1.3	54095.7	2	6.80674	3.96	42.4	7	[YGR113W DAM1 SGDID:S000003345, Chr VII from 718893-719924, Genome Release 64-1-1, Verified ORF, "Essential subunit of the Dam1 complex (aka DASH complex), couples kinetochores to the force produced by MT depolymerization thereby aiding in chromosome segr	K.FADQEGLTS(79.9663)SVGEYNENTIQQLLLPK.I	FADQEGLTSS*VGEYNENTIQQLLLPK	0,	0.137261	[S50]
Dam1_20130201_2.8695.8695.3	4.7105	0.2484	99.8	2980.41	2974.41	-5.3	38517.4	2	5.79759	3.96	42.4	1	[YGR113W DAM1 SGDID:S000003345, Chr VII from 718893-719924, Genome Release 64-1-1, Verified ORF, "Essential subunit of the Dam1 complex (aka DASH complex), couples kinetochores to the force produced by MT depolymerization thereby aiding in chromosome segr	K.FADQEGLTSS(79.9663)VGEYNENTIQQLLLPK.I	FADQEGLT*SSVGEYNENTIQQLLLPK	11.53,	0.13849	[T48]
Dam1_Mps1_TiO2enriched_1.5563.5563.2	4.4505	0.3802	98.8	1714.73	1710.73	-7.5	155356	1	7.19843	4.14	70.8	2	[YGR113W DAM1 SGDID:S000003345, Chr VII from 718893-719924, Genome Release 64-1-1, Verified ORF, "Essential subunit of the Dam1 complex (aka DASH complex), couples kinetochores to the force produced by MT depolymerization thereby aiding in chromosome segregation; Ipl1p target for regulating kinetochore-MT attachments" ]	M.KFADQEGLT(79.9663)SSVGEY.N	KFADQEGLTS*SVGEY	6.9,	0.0706173	[S49]
Dam1_Mps1_TiO2enriched_1.4860.4860.2	5.1471	0.5351	100	1954.82	1953.81	1	47804.1	1	8.33205	3.96	84.6	2	[YGR113W DAM1 SGDID:S000003345, Chr VII from 718893-719924, Genome Release 64-1-1, Verified ORF, "Essential subunit of the Dam1 complex (aka DASH complex), couples kinetochores to the force produced by MT depolymerization thereby aiding in chromosome segregation; Ipl1p target for regulating kinetochore-MT attachments" ]	M.KFADQEGLT(79.9663)SSVGEYNE.N	KFADQEGLT*SSVGEYNE	16.22,	0.99998	T48
Dam1_Mps1_TiO2enriched_1.10840.10840.2	6.2953	0.5173	100	2655.21	2651.19	2.1	55930.3	1	10.1827	3.96	72.4	5	[YGR113W DAM1 SGDID:S000003345, Chr VII from 718893-719924, Genome Release 64-1-1, Verified ORF, "Essential subunit of the Dam1 complex (aka DASH complex), couples kinetochores to the force produced by MT depolymerization thereby aiding in chromosome segregation; Ipl1p target for regulating kinetochore-MT attachments" ]	M.KFADQEGLT(79.9663)SSVGEYNENTIQQL.L	KFADQEGLT*SSVGEYNENTIQQL	9.34,	0.45397	[T48]
Dam1_Mps1_TiO2enriched_1.11276.11276.2	3.2392	0.4423	99.1	2652.18	2651.19	-3	8319.9	1	7.2604	3.96	65.5	1	[YGR113W DAM1 SGDID:S000003345, Chr VII from 718893-719924, Genome Release 64-1-1, Verified ORF, "Essential subunit of the Dam1 complex (aka DASH complex), couples kinetochores to the force produced by MT depolymerization thereby aiding in chromosome segregation; Ipl1p target for regulating kinetochore-MT attachments" ]	M.KFADQEGLTS(79.9663)SVGEYNENTIQQL.L	KFADQEGLT*SSVGEYNENTIQQL	11.51,	0.999983	[T48]
Dam1_Mps1_TiO2enriched_1.16188.16188.2	4.6027	0.4766	100	2766.29	2764.27	2.6	11346.8	1	8.22021	3.96	85.2	1	[YGR113W DAM1 SGDID:S000003345, Chr VII from 718893-719924, Genome Release 64-1-1, Verified ORF, "Essential subunit of the Dam1 complex (aka DASH complex), couples kinetochores to the force produced by MT depolymerization thereby aiding in chromosome segregation; Ipl1p target for regulating kinetochore-MT attachments" ]	M.KFADQEGLT(79.9663)SSVGEYNENTIQQLL.L	KFADQEGLT*SSVGEYNENTIQQLL	13.27,	0.999991	T48
Dam1_Mps1_TiO2enriched_1.7440.7440.2	4.8397	0.547	100	1827.72	1825.72	-0.4	44356.7	1	8.85799	3.34	73.1	1	[YGR113W DAM1 SGDID:S000003345, Chr VII from 718893-719924, Genome Release 64-1-1, Verified ORF, "Essential subunit of the Dam1 complex (aka DASH complex), couples kinetochores to the force produced by MT depolymerization thereby aiding in chromosome segregation; Ipl1p target for regulating kinetochore-MT attachments" ]	K.FADQEGLT(79.9663)SSVGEYNE.N	FADQEGLT*SSVGEYNE	10.28,	0.999945	[T48]
Dam1_Mps1_TiO2enriched_1.18697.18697.2	4.0446	0.4251	98.6	2975.42	2974.41	2.2	431579	1	7.64364	3.96	92.3	5	[YGR113W DAM1 SGDID:S000003345, Chr VII from 718893-719924, Genome Release 64-1-1, Verified ORF, "Essential subunit of the Dam1 complex (aka DASH complex), couples kinetochores to the force produced by MT depolymerization thereby aiding in chromosome segregation; Ipl1p target for regulating kinetochore-MT attachments" ]	K.FADQEGLT(79.9663)SSVGEYNENTIQQLLLPK.I	FADQEGLT*SSVGEYNENTIQQLLLPK	10.76,	0.999994	[T48]
Dam1_Mps1_TiO2enriched_1.18984.18984.2	5.3123	0.5289	100	2977.41	2974.41	-2.2	23825.9	1	9.17274	3.96	81.5	2	[YGR113W DAM1 SGDID:S000003345, Chr VII from 718893-719924, Genome Release 64-1-1, Verified ORF, "Essential subunit of the Dam1 complex (aka DASH complex), couples kinetochores to the force produced by MT depolymerization thereby aiding in chromosome segregation; Ipl1p target for regulating kinetochore-MT attachments" ]	K.FADQEGLTS(79.9663)SVGEYNENTIQQLLLPK.I	FADQEGLTS*SVGEYNENTIQQLLLPK	13.19,	0.999978	S49
Dam1_Mps1_TiO2enriched_1.12712.12712.2	5.9307	0.4262	100	2379.02	2376.02	-4.8	40645.2	2	7.71743	3.34	76.7	1	[YGR113W DAM1 SGDID:S000003345, Chr VII from 718893-719924, Genome Release 64-1-1, Verified ORF, "Essential subunit of the Dam1 complex (aka DASH complex), couples kinetochores to the force produced by MT depolymerization thereby aiding in chromosome segregation; Ipl1p target for regulating kinetochore-MT attachments" ]	F.ADQEGLT(79.9663)SSVGEYNENTIQQL.L	ADQEGLTS*SVGEYNENTIQQL	0,	0.999985	[S49]
Dam1_Mps1_TiO2enriched_1.3921.3921.3	4.6192	0.3438	99	3284.41	3281.41	-4.7	53219.3	2	6.19118	4.19	47.8	2	[YGR113W DAM1 SGDID:S000003345, Chr VII from 718893-719924, Genome Release 64-1-1, Verified ORF, "Essential subunit of the Dam1 complex (aka DASH complex), couples kinetochores to the force produced by MT depolymerization thereby aiding in chromosome segregation; Ipl1p target for regulating kinetochore-MT attachments" ]	K.RKPSKIGNNLQVENEEDYEDDT(79.9663)SSEASF.V	RKPSKIGNNLQVENEEDYEDDTSS*EASF	6.62,	0.999972	[S218]
Dam1_Mps1_TiO2enriched_1.5062.5062.3	4.2861	0.5128	100	3126.33	3125.31	4.5	50258.4	1	7.89584	3.95	55.7	3	[YGR113W DAM1 SGDID:S000003345, Chr VII from 718893-719924, Genome Release 64-1-1, Verified ORF, "Essential subunit of the Dam1 complex (aka DASH complex), couples kinetochores to the force produced by MT depolymerization thereby aiding in chromosome segregation; Ipl1p target for regulating kinetochore-MT attachments" ]	R.KPSKIGNNLQVENEEDYEDDT(79.9663)SSEASF.V	KPSKIGNNLQVENEEDYEDDT*SSEASF	21.75,	0.775206	T216
Dam1_Mps1_TiO2enriched_1.7210.7210.2	4.1275	0.5281	100	2814.14	2813.13	1.4	17175.2	1	9.12789	3.64	91.7	1	[YGR113W DAM1 SGDID:S000003345, Chr VII from 718893-719924, Genome Release 64-1-1, Verified ORF, "Essential subunit of the Dam1 complex (aka DASH complex), couples kinetochores to the force produced by MT depolymerization thereby aiding in chromosome segregation; Ipl1p target for regulating kinetochore-MT attachments" ]	S.KIGNNLQVENEEDYEDDTSS(79.9663)EASF.V	KIGNNLQVENEEDYEDDTSS*EASF	0.06,	0.999981	[S218]
Dam1_Mps1_TiO2enriched_1.7385.7385.2	4.6607	0.3144	99.2	2816.15	2813.13	2.1	58632.8	1	6.45849	3.64	86.4	12	[YGR113W DAM1 SGDID:S000003345, Chr VII from 718893-719924, Genome Release 64-1-1, Verified ORF, "Essential subunit of the Dam1 complex (aka DASH complex), couples kinetochores to the force produced by MT depolymerization thereby aiding in chromosome segregation; Ipl1p target for regulating kinetochore-MT attachments" ]	S.KIGNNLQVENEEDYEDDT(79.9663)SSEASF.V	KIGNNLQVENEEDYEDDT*SSEASF	9.34,	0.999742	[T216]
Dam1_Mps1_TiO2enriched_1.9329.9329.2	3.4102	0.3758	99.3	2815.15	2813.13	3.7	6460.4	1	5.94811	3.64	68	1	[YGR113W DAM1 SGDID:S000003345, Chr VII from 718893-719924, Genome Release 64-1-1, Verified ORF, "Essential subunit of the Dam1 complex (aka DASH complex), couples kinetochores to the force produced by MT depolymerization thereby aiding in chromosome segregation; Ipl1p target for regulating kinetochore-MT attachments" ]	S.KIGNNLQVENEEDYEDDTSSEAS(79.9663)F.V	KIGNNLQVENEEDYEDDTSS*EASF	0,	0.999819	[S218]
Dam1_Mps1_TiO2enriched_2.4356.4356.2	3.8255	0.5179	100	2814.13	2813.13	-1.8	2565.6	1	9.15327	3.64	76.9	2	[YGR113W DAM1 SGDID:S000003345, Chr VII from 718893-719924, Genome Release 64-1-1, Verified ORF, "Essential subunit of the Dam1 complex (aka DASH complex), couples kinetochores to the force produced by MT depolymerization thereby aiding in chromosome segregation; Ipl1p target for regulating kinetochore-MT attachments" ]	S.KIGNNLQVENEEDYEDDTS(79.9663)SEASF.V	KIGNNLQVENEEDYEDDT*SSEASF	0,	0.999954	[T216]
Dam1_Mps1_TiO2enriched_2.4433.4433.3	4.6627	0.4425	100	2814.14	2813.13	1.7	15492.9	1	7.38632	3.64	59	1	[YGR113W DAM1 SGDID:S000003345, Chr VII from 718893-719924, Genome Release 64-1-1, Verified ORF, "Essential subunit of the Dam1 complex (aka DASH complex), couples kinetochores to the force produced by MT depolymerization thereby aiding in chromosome segregation; Ipl1p target for regulating kinetochore-MT attachments" ]	S.KIGNNLQVENEEDYEDDT(79.9663)SSEASF.V	KIGNNLQVENEEDYEDDTSS*EASF	5.92,	0.923069	[S218]
Dam1_Mps1_TiO2enriched_1.9393.9393.2	4.0028	0.4725	100	2895.11	2893.1	1.8	12251.6	1	8.5126	3.64	79.2	1	[YGR113W DAM1 SGDID:S000003345, Chr VII from 718893-719924, Genome Release 64-1-1, Verified ORF, "Essential subunit of the Dam1 complex (aka DASH complex), couples kinetochores to the force produced by MT depolymerization thereby aiding in chromosome segregation; Ipl1p target for regulating kinetochore-MT attachments" ]	S.KIGNNLQVENEEDYEDDTS(79.9663)SEAS(79.9663)F.V	KIGNNLQVENEEDYEDDTS*SEAS*F	[13.19,11.43,]	0.999982	S217, [S221]
Dam1_Mps1_TiO2enriched_1.4401.4401.2	2.5113	0.3868	98.2	1519.76	1519.76	-3.4	23524.1	7	5.76943	10.06	55	1	[YGR113W DAM1 SGDID:S000003345, Chr VII from 718893-719924, Genome Release 64-1-1, Verified ORF, "Essential subunit of the Dam1 complex (aka DASH complex), couples kinetochores to the force produced by MT depolymerization thereby aiding in chromosome segregation; Ipl1p target for regulating kinetochore-MT attachments" ]	K.SILHT(79.9663)IRNSIASGA.D	SILHT*IRNSIASGA	24.39,	0.999988	T261
Dam1_Mps1_TiO2enriched_1.14140.14140.3	3.9381	0.5023	100	2913.46	2912.45	1.8	40849.4	40	7.20698	4.72	40.3	1	[YGR113W DAM1 SGDID:S000003345, Chr VII from 718893-719924, Genome Release 64-1-1, Verified ORF, "Essential subunit of the Dam1 complex (aka DASH complex), couples kinetochores to the force produced by MT depolymerization thereby aiding in chromosome segregation; Ipl1p target for regulating kinetochore-MT attachments" ]	K.SILHT(79.9663)IRNSIASGADLPIENDNVVNLG.D	SILHT*IRNSIASGADLPIENDNVVNLG	5.36,	0.48968	[T261]
Dam1_Mps1_TiO2enriched_1.11981.11981.3	4.1341	0.397	100	3760.84	3758.86	-6.8	50561.2	2	5.98022	5.63	49.4	1	[YGR113W DAM1 SGDID:S000003345, Chr VII from 718893-719924, Genome Release 64-1-1, Verified ORF, "Essential subunit of the Dam1 complex (aka DASH complex), couples kinetochores to the force produced by MT depolymerization thereby aiding in chromosome segregation; Ipl1p target for regulating kinetochore-MT attachments" ]	K.S(79.9663)ILHTIRNSIASGADLPIENDNVVNLGDLHPNNR.I	SILHT*IRNSIASGADLPIENDNVVNLGDLHPNNR	8.68,	0.999983	[T261]
Dam1_Mps1_TiO2enriched_1.11989.11989.3	3.1509	0.4282	99.2	3758.86	3758.86	0.1	32559.8	1	6.80027	5.63	51.9	1	[YGR113W DAM1 SGDID:S000003345, Chr VII from 718893-719924, Genome Release 64-1-1, Verified ORF, "Essential subunit of the Dam1 complex (aka DASH complex), couples kinetochores to the force produced by MT depolymerization thereby aiding in chromosome segregation; Ipl1p target for regulating kinetochore-MT attachments" ]	K.SILHT(79.9663)IRNSIASGADLPIENDNVVNLGDLHPNNR.I	SILHT*IRNSIASGADLPIENDNVVNLGDLHPNNR	3.88,	0.999973	[T261]
Dam1_Mps1_TiO2enriched_1.14413.14413.4	4.4291	0.3279	99.2	4074.06	4072.06	-2.1	53036.9	2	5.19452	5.63	39.4	1	[YGR113W DAM1 SGDID:S000003345, Chr VII from 718893-719924, Genome Release 64-1-1, Verified ORF, "Essential subunit of the Dam1 complex (aka DASH complex), couples kinetochores to the force produced by MT depolymerization thereby aiding in chromosome segregation; Ipl1p target for regulating kinetochore-MT attachments" ]	K.S(79.9663)ILHTIRNSIASGADLPIENDNVVNLGDLHPNNRISL.G	SILHT*IRNSIASGADLPIENDNVVNLGDLHPNNRISL	9.44,	0.950481	[T261]
Dam1_20130201_9.11780.11780.3	4.0492	0.3303	100	3751.82	3750.82	-0.9	62359.8	1	6.43044	4.89	44.6	1	[YGR113W DAM1 SGDID:S000003345, Chr VII from 718893-719924, Genome Release 64-1-1, Verified ORF, "Essential subunit of the Dam1 complex (aka DASH complex), couples kinetochores to the force produced by MT depolymerization thereby aiding in chromosome segr	R.NSIASGADLPIENDNVVNLGDLHPNNRIS(79.9663)LGSGAAR.V	NSIASGADLPIENDNVVNLGDLHPNNRIS*LGSGAAR	8.06,	0.999993	[S292]
Dam1_Mps1_TiO2enriched_1.2429.2429.3	4.2619	0.3362	99.2	3120.39	3119.38	1.4	244549	1	6.33437	8.8	61	1	[YGL061C DUO1 SGDID:S000003029, Chr VII from 389711-388968, Genome Release 64-1-1, reverse complement, Verified ORF, "Essential subunit of the Dam1 complex (aka DASH complex), couples kinetochores to the force produced by MT depolymerization thereby aiding in chromosome segregation; is transferred to the kinetochore prior to mitosis" ]	F.NEMRSNLNNT(79.9663)TNKFPKSTGGGASDNISAN.S	NEMRSNLNNTT*NKFPKSTGGGASDNISAN	4.79,	0.999986	[T31]
Dam1_Mps1_TiO2enriched_1.2482.2482.3	3.8091	0.3513	98.6	3120.39	3119.38	-0.4	176285	1	5.30331	8.8	56.7	1	[YGL061C DUO1 SGDID:S000003029, Chr VII from 389711-388968, Genome Release 64-1-1, reverse complement, Verified ORF, "Essential subunit of the Dam1 complex (aka DASH complex), couples kinetochores to the force produced by MT depolymerization thereby aiding in chromosome segregation; is transferred to the kinetochore prior to mitosis" ]	F.NEMRSNLNNTT(79.9663)NKFPKSTGGGASDNISAN.S	NEMRSNLNNTT*NKFPKSTGGGASDNISAN	11.35,	0.999451	[T31]
Dam1_Mps1_TiO2enriched_1.2706.2706.3	3.1095	0.3715	98.2	2592.17	2591.17	-1.4	332566	1	5.94007	4.58	53.4	1	[YGL061C DUO1 SGDID:S000003029, Chr VII from 389711-388968, Genome Release 64-1-1, reverse complement, Verified ORF, "Essential subunit of the Dam1 complex (aka DASH complex), couples kinetochores to the force produced by MT depolymerization thereby aiding in chromosome segregation; is transferred to the kinetochore prior to mitosis" ]	L.KLINDRLHNENVNTNDEDGST(79.9663)L.H	KLINDRLHNENVNTNDEDGST*L	19.21,	0.766604	T151
Dam1_Mps1_TiO2enriched_1.5208.5208.3	5.0492	0.3899	100	3244.57	3238.55	-0.5	378827	11	6.24505	4.98	42.9	2	[YGL061C DUO1 SGDID:S000003029, Chr VII from 389711-388968, Genome Release 64-1-1, reverse complement, Verified ORF, "Essential subunit of the Dam1 complex (aka DASH complex), couples kinetochores to the force produced by MT depolymerization thereby aiding in chromosome segregation; is transferred to the kinetochore prior to mitosis" ]	L.KLINDRLHNENVNTNDEDGST(79.9663)LHNVIAL.K	KLINDRLHNENVNTNDEDGST*LHNVIAL	0,	0.999939	[T151]
Dam1_Mps1_TiO2enriched_1.4338.4338.4	4.7014	0.4618	100	3240.56	3238.55	0.7	74271.7	1	6.36357	4.98	57.8	1	[YGL061C DUO1 SGDID:S000003029, Chr VII from 389711-388968, Genome Release 64-1-1, reverse complement, Verified ORF, "Essential subunit of the Dam1 complex (aka DASH complex), couples kinetochores to the force produced by MT depolymerization thereby aiding in chromosome segregation; is transferred to the kinetochore prior to mitosis" ]	K.LINDRLHNENVNTNDEDGST(79.9663)LHNVIALK.K	LINDRLHNENVNTNDEDGST*LHNVIALK	6.62,	0.992928	[T151]
Dam1_Mps1_TiO2enriched_1.2615.2615.2	4.1117	0.4305	98.5	2351	2349.99	-0.1	26449	1	7.21451	4.25	64.3	1	[YGL061C DUO1 SGDID:S000003029, Chr VII from 389711-388968, Genome Release 64-1-1, reverse complement, Verified ORF, "Essential subunit of the Dam1 complex (aka DASH complex), couples kinetochores to the force produced by MT depolymerization thereby aiding in chromosome segregation; is transferred to the kinetochore prior to mitosis" ]	L.INDRLHNENVNTNDEDGST(79.9663)L.H	INDRLHNENVNTNDEDGST*L	0,	0.838634	[T151]
Dam1_Mps1_TiO2enriched_1.2615.2615.2	4.1117	0.4305	98.5	2351	2349.99	-0.1	26449	1	7.21451	4.25	64.3	1	[YGL061C DUO1 SGDID:S000003029, Chr VII from 389711-388968, Genome Release 64-1-1, reverse complement, Verified ORF, "Essential subunit of the Dam1 complex (aka DASH complex), couples kinetochores to the force produced by MT depolymerization thereby aiding in chromosome segregation; is transferred to the kinetochore prior to mitosis" ]	L.INDRLHNENVNTNDEDGS(79.9663)TL.H	INDRLHNENVNTNDEDGST*L	0,	0.838634	[T151]
Dam1_Mps1_TiO2enriched_1.5476.5476.3	4.3058	0.4013	100	2998.37	2997.37	-1.3	90857.5	1	6.41762	4.58	47.8	1	[YGL061C DUO1 SGDID:S000003029, Chr VII from 389711-388968, Genome Release 64-1-1, reverse complement, Verified ORF, "Essential subunit of the Dam1 complex (aka DASH complex), couples kinetochores to the force produced by MT depolymerization thereby aiding in chromosome segregation; is transferred to the kinetochore prior to mitosis" ]	L.INDRLHNENVNTNDEDGS(79.9663)TLHNVIAL.K	INDRLHNENVNTNDEDGST*LHNVIAL	11.53,	0.99959	[T151]
Dam1_Mps1_TiO2enriched_1.6081.6081.2	4.581	0.4958	100	2500.11	2499.11	-1.2	54599.6	1	7.77757	4.4	88	1	[YGL061C DUO1 SGDID:S000003029, Chr VII from 389711-388968, Genome Release 64-1-1, reverse complement, Verified ORF, "Essential subunit of the Dam1 complex (aka DASH complex), couples kinetochores to the force produced by MT depolymerization thereby aiding in chromosome segregation; is transferred to the kinetochore prior to mitosis" ]	R.LHNENVNTNDEDGST(79.9663)LHNVIAL.K	LHNENVNTNDEDGST*LHNVIAL	13.24,	0.998004	T151
Dam1_Mps1_TiO2enriched_1.3516.3516.2	3.9109	0.3481	99.2	2628.21	2627.21	-2.5	105398	2	6.27422	4.84	78.6	1	[YGL061C DUO1 SGDID:S000003029, Chr VII from 389711-388968, Genome Release 64-1-1, reverse complement, Verified ORF, "Essential subunit of the Dam1 complex (aka DASH complex), couples kinetochores to the force produced by MT depolymerization thereby aiding in chromosome segregation; is transferred to the kinetochore prior to mitosis" ]	R.LHNENVNTNDEDGS(79.9663)TLHNVIALK.K	LHNENVNTNDEDGST*LHNVIALK	16.22,	0.999995	T151
Dam1_Mps1_TiO2enriched_1.5505.5505.3	3.6209	0.3995	99.1	2628.22	2627.21	3.8	46718.1	45	5.68089	4.84	41.1	1	[YGL061C DUO1 SGDID:S000003029, Chr VII from 389711-388968, Genome Release 64-1-1, reverse complement, Verified ORF, "Essential subunit of the Dam1 complex (aka DASH complex), couples kinetochores to the force produced by MT depolymerization thereby aiding in chromosome segregation; is transferred to the kinetochore prior to mitosis" ]	R.LHNENVNT(79.9663)NDEDGSTLHNVIALK.K	LHNENVNTNDEDGST*LHNVIALK	7.48,	0.996344	[T151]
Dam1_Mps1_TiO2enriched_1.6008.6008.3	5.3134	0.5062	100	2628.22	2627.21	2.3	27023.7	2	8.47947	4.84	54.4	17	[YGL061C DUO1 SGDID:S000003029, Chr VII from 389711-388968, Genome Release 64-1-1, reverse complement, Verified ORF, "Essential subunit of the Dam1 complex (aka DASH complex), couples kinetochores to the force produced by MT depolymerization thereby aiding in chromosome segregation; is transferred to the kinetochore prior to mitosis" ]	R.LHNENVNTNDEDGST(79.9663)LHNVIALK.K	LHNENVNTNDEDGST*LHNVIALK	0,	0.999738	[T151]
Dam1_Mps1_TiO2enriched_1.3325.3325.2	3.9367	0.3978	98.9	2515.13	2514.13	-0.7	46955.6	1	6.81355	4.84	66.7	1	[YGL061C DUO1 SGDID:S000003029, Chr VII from 389711-388968, Genome Release 64-1-1, reverse complement, Verified ORF, "Essential subunit of the Dam1 complex (aka DASH complex), couples kinetochores to the force produced by MT depolymerization thereby aiding in chromosome segregation; is transferred to the kinetochore prior to mitosis" ]	L.HNENVNTNDEDGST(79.9663)LHNVIALK.K	HNENVNTNDEDGST*LHNVIALK	9.34,	0.999993	[T151]
Dam1_20130201_8.16743.16743.3	6.5608	0.531	100	2628.22	2627.21	2.9	25793	2	9.97218	4.84	55.4	16	[YGL061C DUO1 SGDID:S000003029, Chr VII from 389711-388968, Genome Release 64-1-1, reverse complement, Verified ORF, "Essential subunit of the Dam1 complex (aka DASH complex), couples kinetochores to the force produced by MT depolymerization thereby aidin	R.LHNENVNTNDEDGST(79.9663)LHNVIALK.K	LHNENVNTNDEDGST*LHNVIALK	10.33,	0.998875	[T151]
Dam1_20130201_8.17597.17597.3	4.7701	0.4496	100	2628.22	2627.21	4	18556.9	1	8.19299	4.84	53.7	15	[YGL061C DUO1 SGDID:S000003029, Chr VII from 389711-388968, Genome Release 64-1-1, reverse complement, Verified ORF, "Essential subunit of the Dam1 complex (aka DASH complex), couples kinetochores to the force produced by MT depolymerization thereby aidin	R.LHNENVNTNDEDGS(79.9663)TLHNVIALK.K	LHNENVNTNDEDGS*TLHNVIALK	18.87,	0.98895	S150
Dam1_Mps1_TiO2enriched_1.17629.17629.2	4.6887	0.478	100	2054.04	2053.05	-2.9	26143.1	2	8.25871	4.14	53.6	5	[YDR201W SPC19 SGDID:S000002609, Chr IV from 856317-856814, Genome Release 64-1-1, Verified ORF, "Essential subunit of the Dam1 complex (aka DASH complex), couples kinetochores to the force produced by MT depolymerization thereby aiding in chromosome segregation; also localized to nuclear side of spindle pole body" ]	M.TDALEQSVLALEGT(79.9663)VSVLK.D	TDALEQSVLALEGT*VSVLK	42.65,	0.946492	T15
Dam1_20130201_7.11382.11382.3	5.1935	0.3841	100	3476.65	3474.64	1.5	12004.6	61	7.44326	6.56	30.6	18	[YKR037C SPC34 SGDID:S000001745, Chr XI from 511797-510910, Genome Release 64-1-1, reverse complement, Verified ORF, "Essential subunit of the Dam1 complex (aka DASH complex), couples kinetochores to the force produced by MT depolymerization thereby aidin	R.RTATT(79.9663)SGGGLNGFIFDTDLIGSSVISNSSSGTFK.A	RTATTSGGGLNGFIFDT*DLIGSSVISNSSSGTFK	5.42,	0.999214	[T145]
Dam1_20130201_7.12161.12161.3	4.794	0.3829	100	3320.53	3318.54	-6.8	9342	1	6.05722	4.46	45.1	9	[YKR037C SPC34 SGDID:S000001745, Chr XI from 511797-510910, Genome Release 64-1-1, reverse complement, Verified ORF, "Essential subunit of the Dam1 complex (aka DASH complex), couples kinetochores to the force produced by MT depolymerization thereby aidin	R.TATTSGGGLNGFIFDT(79.9663)DLIGSSVISNSSSGTFK.A	TATTSGGGLNGFIFDT*DLIGSSVISNSSSGTFK	24.27,	0.332252	T145
Dam1_20130201_10.12174.12174.3	4.455	0.4026	100	2016.06	2015.06	0.1	13020.9	1	7.15998	6.56	75	19	[YKR037C SPC34 SGDID:S000001745, Chr XI from 511797-510910, Genome Release 64-1-1, reverse complement, Verified ORF, "Essential subunit of the Dam1 complex (aka DASH complex), couples kinetochores to the force produced by MT depolymerization thereby aidin	R.RKT(79.9663)IFVEDFPTDLILK.V	RKT*IFVEDFPTDLILK	85.99,	0.858876	T199
